# Supplementary material for: Gender Differences in the Associations Between Informal Caregiving and Wellbeing in Low- and Middle-Income Countries
Source: PubMed Central journal article supplement (PMC7583325; doi:10.1089/jwh.2019.7769), 2020-10-14
Supplement: Suppl_TableS1.pdf [file Suppl_TableS1.pdf]

## Supplementary Data

SUPPLEMENTARY TABLE S1. COMPARING AFFECT MEASURES (FEELING DEPRESSED AND FEELING ANXIETY)  
AGAINST DIAGNOSED DEPRESSION AMONG ADULTS IN THE WHO-SAGE STUDY (2007–2010)

|                            | <i>Diagnosed depression</i> |             |              | <i>Chi-square and p</i> |
|----------------------------|-----------------------------|-------------|--------------|-------------------------|
|                            | <i>No</i>                   | <i>Yes</i>  | <i>Total</i> |                         |
| Feeling sad or depressed   |                             |             |              |                         |
| None                       | 13,751 (98.26)              | 243 (1.74)  | 13,994       | 637.1, <0.0001          |
| Mild–moderate              | 10,554 (94.38)              | 628 (5.62)  | 11,182       |                         |
| Severe–extreme             | 1,423 (86.50)               | 222 (13.50) | 1,645        |                         |
| Feeling worried or anxiety |                             |             |              |                         |
| None                       | 11,982 (98.41)              | 194 (1.59)  | 12,176       | 628.3, <0.0001          |
| Mild–moderate              | 11,515 (95.09)              | 595 (4.91)  | 12,110       |                         |
| Severe–extreme             | 2,183 (87.85)               | 302 (12.15) | 2,485        |                         |

WHO-SAGE, World Health Organization Study on Global AGEing and Adult Health.
